# Supplementary material for: Association of Unhealthy Lifestyle and Genetic Risk Factors With Mild Cognitive Impairment in Chinese Older Adults
Source: PubMed Central journal article supplement (PMC10354670; doi:10.1001/jamanetworkopen.2023.24031), 2023-07-18
Supplement: jamanetwopen-e2324031-s001.pdf [file jamanetwopen-e2324031-s001.pdf]

## Supplemental Online Content

Duan H, Zhou D, Xu N, et al. Association of unhealthy lifestyle and genetic risk factors with mild cognitive impairment in Chinese older adults. *JAMA Netw Open*. 2023;6(7):e2324031. doi:10.1001/jamanetworkopen.2023.24031

**eFigure.** Flowchart of Study Participants

**eTable 1.** The Frequency of Missing Variables

**eTable 2.** The Longitudinal Association Between Lifestyle Factors and MCI

**eTable 3.** Risk of MCI According to Unweighted Lifestyle Categories and Weighted Genetic Risks

**eTable 4.** Risk of MCI According to Weighted Lifestyle Categories and Unweighted Genetic Risks

**eTable 5.** Risk of MCI According to Unweighted Lifestyle Categories and Unweighted Genetic Risks

**eTable 6.** Risk of MCI According to Weighted Lifestyle Categories and Weighted Genetic Risks

**eTable 7.** Risk of MCI According to Lifestyle Categories and Genetic Risks Stratified by Sex and Age

**eTable 8.** Risk of MCI According to Lifestyle Categories and Genetic Risks Stratified by Education Levels

**eTable 9.** Risk of MCI According to Lifestyle Categories and Genetic Risks Stratified by Hypertension and Diabetes

**eTable 10.** The Longitudinal Association Among Lifestyle Score, Genetic Risk Score, and MCI

This supplemental material has been provided by the authors to give readers additional information about their work.

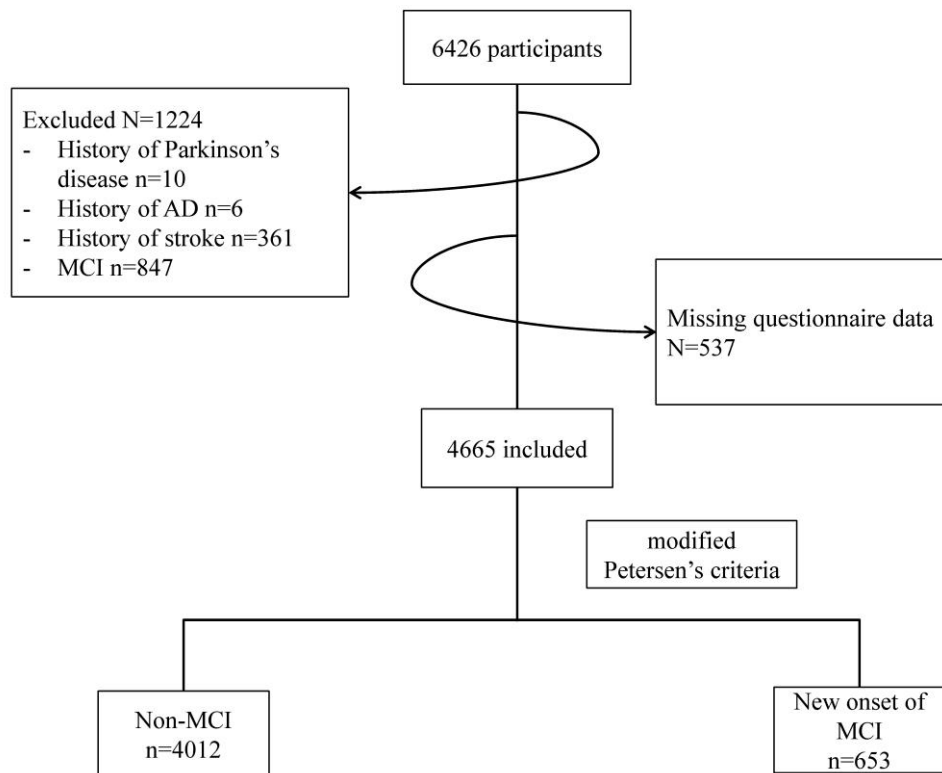

**eFigure.** Flowchart of Study Participants.

AD, Alzheimer's disease; MCI, mild cognitive impairment.

**eTable 1. The Frequency of Missing Variables**

| <b>Variables</b>                               | <b>Missing (%)</b> |
|------------------------------------------------|--------------------|
| Body mass index                                | 1.51               |
| Baseline mild cognitive impairment information | 0.12               |
| Lost to follow-up                              | 0.33               |
| Smoking status                                 | 0.54               |
| Alcohol consumption                            | 0.82               |
| Fruit intake                                   | 0.75               |
| Salt intake                                    | 2.32               |
| Cooking oil consumption                        | 0.44               |
| Cereal intake                                  | 1.04               |
| Vegetable intake                               | 3.38               |
| Egg intake                                     | 0.17               |
| Meat intake                                    | 3.31               |
| Physical activities                            | 1.12               |

**eTable 2. The Longitudinal Association Between Lifestyle Factors and MCI**

| Lifestyle Characteristics | Univariate Model |         | Multivariable Model 1 <sup>a</sup> |         | Multivariable Model 2 <sup>b</sup> |         |
|---------------------------|------------------|---------|------------------------------------|---------|------------------------------------|---------|
|                           | HR (95% CI)      | P Value | HR (95% CI)                        | P Value | HR (95% CI)                        | P Value |
| Healthy diet              |                  | .05     |                                    | .01     |                                    | .02     |
| Yes                       | 1 [Reference]    |         | 1 [Reference]                      |         | 1 [Reference]                      |         |
| No                        | 1.24 (1.00-1.55) |         | 1.34 (1.07-1.67)                   |         | 1.31 (1.04-1.63)                   |         |
| Regular physical activity |                  | <.001   |                                    | <.001   |                                    | <.001   |
| Yes                       | 1 [Reference]    |         | 1 [Reference]                      |         | 1 [Reference]                      |         |
| No                        | 2.12 (1.81-2.49) |         | 2.00 (1.70-2.35)                   |         | 2.11 (1.79-2.48)                   |         |
| Limited alcohol drinking  |                  | <.001   |                                    | .07     |                                    | .23     |
| Yes                       | 1 [Reference]    |         | 1 [Reference]                      |         | 1 [Reference]                      |         |
| No                        | 1.62 (1.33-1.97) |         | 1.22 (0.98-1.51)                   |         | 1.14 (0.92-1.42)                   |         |
| Non-current smoking       |                  | <.001   |                                    | .004    |                                    | .02     |
| Yes                       | 1 [Reference]    |         | 1 [Reference]                      |         | 1 [Reference]                      |         |
| No                        | 1.46 (1.24-1.70) |         | 1.30 (1.09-1.55)                   |         | 1.25 (1.04-1.49)                   |         |

<sup>a</sup> Multivariable model 1 adjusted for sex, age, education levels, BMI, income, hypertension, diabetes and living alone.

<sup>b</sup> Multivariable model 2 additionally adjusted weighted genetic risks and lifestyle factors (smoking status, alcohol consumption, physical activity and dietary intake) based on multivariable model 1.

**eTable 3. Risk of MCI According to Unweighted Lifestyle Categories and Weighted Genetic Risks<sup>a</sup>**

| <b>Subgroup</b>     | <b>MCI / Non-MCI<br/>(653 / 4012)</b> | <b>HR (95% CI)</b> | <b>P Value</b> | <b>P for trend</b> |
|---------------------|---------------------------------------|--------------------|----------------|--------------------|
| Low genetic risk    |                                       |                    |                | <.001              |
| Healthy lifestyle   | 62 / 1236                             | 1 [Reference]      |                |                    |
| Unhealthy lifestyle | 333 / 1610                            | 3.60 (2.73-4.74)   | <.001          |                    |
| High genetic risk   |                                       |                    |                |                    |
| Healthy lifestyle   | 106 / 502                             | 3.34 (2.44-4.58)   | <.001          |                    |
| Unhealthy lifestyle | 152 / 664                             | 4.16 (3.08-5.62)   | <.001          |                    |

<sup>a</sup> Model adjusted for sex, age, education levels, BMI, income, hypertension, diabetes and living alone.

**eTable 4. Risk of MCI According to Weighted Lifestyle Categories and Unweighted Genetic Risks<sup>a</sup>**

| <b>Subgroup</b>     | <b>MCI / Non-MCI<br/>(653 / 4012)</b> | <b>HR (95% CI)</b> | <b>P Value</b> | <b>P for trend</b> |
|---------------------|---------------------------------------|--------------------|----------------|--------------------|
| Low genetic risk    |                                       |                    |                | <.001              |
| Healthy lifestyle   | 49 / 1146                             | 1 [Reference]      |                |                    |
| Unhealthy lifestyle | 259 / 1316                            | 4.78 (3.52-6.49)   | <.001          |                    |
| High genetic risk   |                                       |                    |                |                    |
| Healthy lifestyle   | 182 / 769                             | 4.39 (3.20-6.02)   | <.001          |                    |
| Unhealthy lifestyle | 163 / 781                             | 5.68 (4.12-7.83)   | <.001          |                    |

<sup>a</sup> Model adjusted for sex, age, education levels, BMI, income, hypertension, diabetes and living alone.

**eTable 5. Risk of MCI According to Unweighted Lifestyle Categories and Unweighted Genetic Risks<sup>a</sup>**

| Subgroup            | MCI / Non-MCI<br>(653 / 4012) | HR (95% CI)       | P Value | P for trend |
|---------------------|-------------------------------|-------------------|---------|-------------|
| Low genetic risk    |                               |                   |         | <.001       |
| Healthy lifestyle   | 24 / 1062                     | 1 [Reference]     |         |             |
| Unhealthy lifestyle | 284 / 1400                    | 7.33 (4.82-11.16) | <.001   |             |
| High genetic risk   |                               |                   |         |             |
| Healthy lifestyle   | 144 / 676                     | 7.02 (4.56-10.82) | <.001   |             |
| Unhealthy lifestyle | 201 / 874                     | 8.96 (5.85-13.74) | <.001   |             |

<sup>a</sup> Model adjusted for sex, age, education levels, BMI, income, hypertension, diabetes and living alone.

**eTable 6. Risk of MCI According to Weighted Lifestyle Categories<sup>a</sup> and Weighted Genetic Risks<sup>b</sup>**

| Subgroup            | MCI / Non-MCI<br>(653 / 4012) | HR (95% CI)       | P Value | P for trend |
|---------------------|-------------------------------|-------------------|---------|-------------|
| Low genetic risk    |                               |                   |         | <.001       |
| Healthy lifestyle   | 119 / 1565                    | 1 [Reference]     |         |             |
| Unhealthy lifestyle | 276 / 1281                    | 2.79 (2.25- 3.47) | <.001   |             |
| High genetic risk   |                               |                   |         |             |
| Healthy lifestyle   | 151 / 668                     | 2.41 (1.89-3.07)  | <.001   |             |
| Unhealthy lifestyle | 107 / 498                     | 3.23 (2.48-4.20)  | <.001   |             |

<sup>a</sup> Healthy lifestyle including non-current smoking, limited alcohol drinking, regular physical activity, healthy diet and normal BMI. <sup>b</sup> Model adjusted for sex, age, education levels, income, hypertension, diabetes and living alone.

**eTable 7. Risk of MCI According to Lifestyle Categories and Genetic Risks Stratified by Sex and Age**

| Subgroup                 | Male (n=2119) <sup>a</sup> |         | Female (n=2546) <sup>a</sup> |         | Age <70 (n=3042) <sup>b</sup> |         | age≥70 (n=1623) <sup>b</sup> |         |
|--------------------------|----------------------------|---------|------------------------------|---------|-------------------------------|---------|------------------------------|---------|
|                          | HR (95% CI)                | P Value | HR (95% CI)                  | P Value | HR (95% CI)                   | P Value | HR (95% CI)                  | P Value |
| <b>Low genetic risk</b>  |                            |         |                              |         |                               |         |                              |         |
| Healthy lifestyle        | 1 [Reference]              |         | 1 [Reference]                |         | 1 [Reference]                 |         | 1 [Reference]                |         |
| Unhealthy lifestyle      | 2.41 (1.81-3.22)           | <.001   | 4.08 (2.76-6.02)             | <.001   | 2.73 (2.06-3.63)              | <.001   | 3.80 (2.53-5.71)             | <.001   |
| <b>High genetic risk</b> |                            |         |                              |         |                               |         |                              |         |
| Healthy lifestyle        | 1.95 (1.38-2.77)           | <.001   | 3.93 (2.60-5.96)             | <.001   | 2.52 (1.82-3.48)              | <.001   | 2.98 (1.88-4.71)             | <.001   |
| Unhealthy lifestyle      | 2.71 (1.92-3.84)           | <.001   | 5.55 (3.58-8.59)             | <.001   | 3.34 (2.38-4.71)              | <.001   | 4.39 (2.79-6.90)             | <.001   |
| <b>P for trend</b>       | <.001                      |         | <.001                        |         | <.001                         |         | <.001                        |         |

<sup>a</sup> Model adjusted for age, education levels, BMI, income, hypertension, diabetes and living alone.

<sup>b</sup> Model adjusted for sex, education levels, BMI, income, hypertension, diabetes and living alone.

**eTable 8. Risk of MCI According to Lifestyle Categories and Genetic Risks Stratified by Education Levels<sup>a</sup>**

| Subgroup                 | Elementary school or below (n=2477) |                |                    | Junior high school and above (n=2188) |                |                    |
|--------------------------|-------------------------------------|----------------|--------------------|---------------------------------------|----------------|--------------------|
|                          | <i>HR (95% CI)</i>                  | <i>P Value</i> | <i>P for trend</i> | <i>HR (95% CI)</i>                    | <i>P Value</i> | <i>P for trend</i> |
| <b>Low genetic risk</b>  |                                     |                | <.001              |                                       |                | <.001              |
| Healthy lifestyle        | 1 [Reference]                       |                |                    | 1 [Reference]                         |                |                    |
| Unhealthy lifestyle      | 6.05 (3.759-9.76)                   | <.001          |                    | 2.24 (1.71-2.94)                      | <.001          |                    |
| <b>High genetic risk</b> |                                     |                |                    |                                       |                |                    |
| Healthy lifestyle        | 4.99 (2.96-8.40)                    | <.001          |                    | 2.01 (1.47-2.74)                      | <.001          |                    |
| Unhealthy lifestyle      | 7.70 (4.55-13.01)                   | <.001          |                    | 2.52 (1.82-3.48)                      | <.001          |                    |

<sup>a</sup> Model adjusted for age, sex, BMI, income, hypertension, diabetes and living alone.



**eTable 9. Risk of MCI According to Lifestyle Categories and Genetic Risks Stratified by Hypertension and Diabetes**

| Subgroup                 | Hypertension (n=3147) <sup>a</sup> |         | Non-hypertension (n=1518) <sup>a</sup> |         | Diabetes (n=1385) <sup>b</sup> |         | Non-diabetes (n=3280) <sup>b</sup> |         |
|--------------------------|------------------------------------|---------|----------------------------------------|---------|--------------------------------|---------|------------------------------------|---------|
|                          | HR (95% CI)                        | P Value | HR (95% CI)                            | P Value | HR (95% CI)                    | P Value | HR (95% CI)                        | P Value |
| <b>Low genetic risk</b>  |                                    |         |                                        |         |                                |         |                                    |         |
| Healthy lifestyle        | 1 [Reference]                      |         | 1 [Reference]                          |         | 1 [Reference]                  |         | 1 [Reference]                      |         |
| Unhealthy lifestyle      | 2.89 (2.21-3.78)                   | <.001   | 3.20 (2.01-5.09)                       | <.001   | 2.71 (1.79-4.10)               | <.001   | 3.23 (2.44-4.28)                   | <.001   |
| <b>High genetic risk</b> |                                    |         |                                        |         |                                |         |                                    |         |
| Healthy lifestyle        | 2.53 (1.86-3.43)                   | <.001   | 2.92 (1.73-4.94)                       | <.001   | 2.26 (1.44-3.55)               | <.001   | 2.85 (2.06-3.95)                   | <.001   |
| Unhealthy lifestyle      | 3.27 (2.39-4.48)                   | <.001   | 4.15 (2.42-7.10)                       | <.001   | 3.19 (1.98-5.14)               | <.001   | 3.80 (2.73-5.28)                   | <.001   |
| <b>P for trend</b>       | <.001                              |         | <0.001                                 |         | <0.001                         |         | <0.001                             |         |

<sup>a</sup> Model adjusted for age, sex, education levels, BMI, income, diabetes and living alone.

<sup>b</sup> Model adjusted for age, sex, education levels, BMI, income, hypertension and living alone.

**eTable 10. The Longitudinal Association Among Lifestyle Score, Genetic Risk Score, and MCI<sup>a</sup>**

| Scores                        | Univariate Model   |                | Multivariable Model |                |
|-------------------------------|--------------------|----------------|---------------------|----------------|
|                               | <i>HR (95% CI)</i> | <i>P Value</i> | <i>HR (95% CI)</i>  | <i>P Value</i> |
| Weighted lifestyle score      | 1.42 (1.33-1.51)   | <.001          | 1.37 (1.29-1.47)    | <.001          |
| Weighted genetic risk score   | 1.61 (1.42-1.83)   | <.001          | 1.51 (1.33-1.71)    | <.001          |
| Unweighted lifestyle score    | 1.48 (1.37-1.61)   | <.001          | 1.44 (1.32-1.58)    | <.001          |
| Unweighted genetic risk score | 1.44 (1.30-1.59)   | <.001          | 1.38 (1.24-1.52)    | <.001          |

<sup>a</sup> Model adjusted for sex, age, education levels, BMI, income, hypertension, diabetes and living alone.
