# Supplementary material for: Association of Unhealthy Lifestyle and Genetic Risk Factors With Mild Cognitive Impairment in Chinese Older Adults
Source: PubMed Central journal article supplement (PMC10354670; doi:10.1001/jamanetworkopen.2023.24031), 2023-07-18
Supplement: jamanetwopen-e2324031-s002.pdf [file jamanetwopen-e2324031-s002.pdf]

## Data Sharing Statement

Duan. Association of Unhealthy Lifestyle and Genetic Risk Factors With Mild Cognitive Impairment in Chinese Older Adults. *JAMA Netw Open*. Published July 18, 2023.  
doi:10.1001/jamanetworkopen.2023.24031

### Data

**Data available:** No

### Additional Information

**Explanation for why data not available:** This cohort study is in the process of being followed-up.
